# Supplementary material
Source: MDPI journal article supplement (https://www.mdpi.com/2073-445X/13/3/325)
Supplement: s1 [file s1]

# Mediterranean forest fires effect on soil quality and soil properties: The case of northern Euboea, Greece

Ifigeneia Megremi, Eleni Stathopoulou, Efstathios Vorris, Marios Kostakis, Sotiris Karavoltzos, Nikolaos Thoamidis and Charalampos Vasilatos

**Table S1.** Trace elements' 'pseudo total' median, minimum (min) and maximum (max) contents in top- and subsoil samples.

|           | Aqua Regia (µg/g) |      |       |                 |       |       |
|-----------|-------------------|------|-------|-----------------|-------|-------|
|           | TOPSOILS (n=17)   |      |       | SUBSOILS (n=17) |       |       |
|           | Median            | Min  | Max   | Median          | Min   | Max   |
| <i>Pb</i> | 77                | 18   | 136   | 19              | 7.32  | 71    |
| <i>Zn</i> | 91                | 48   | 161   | 64              | 26    | 186   |
| <i>Cd</i> | 1.0               | BDL  | 8.0   | 0.236           | 0.059 | 2.20  |
| <i>Cu</i> | 27                | 7.2  | 42    | 27              | 5.84  | 38    |
| <i>Mn</i> | 834               | 121  | 1705  | 838             | 251   | 1459  |
| <i>Fe</i> | 19400             | 6846 | 49680 | 26629           | 9556  | 71015 |
| <i>Cr</i> | 334               | 89   | 1001  | 248             | 5.55  | 627   |
| <i>Ni</i> | 174               | 20   | 1461  | 485             | 8.96  | 2864  |
| <i>Co</i> | 62                | 31   | 128   | 51              | 25    | 153   |

BDL: Below Detection Limit

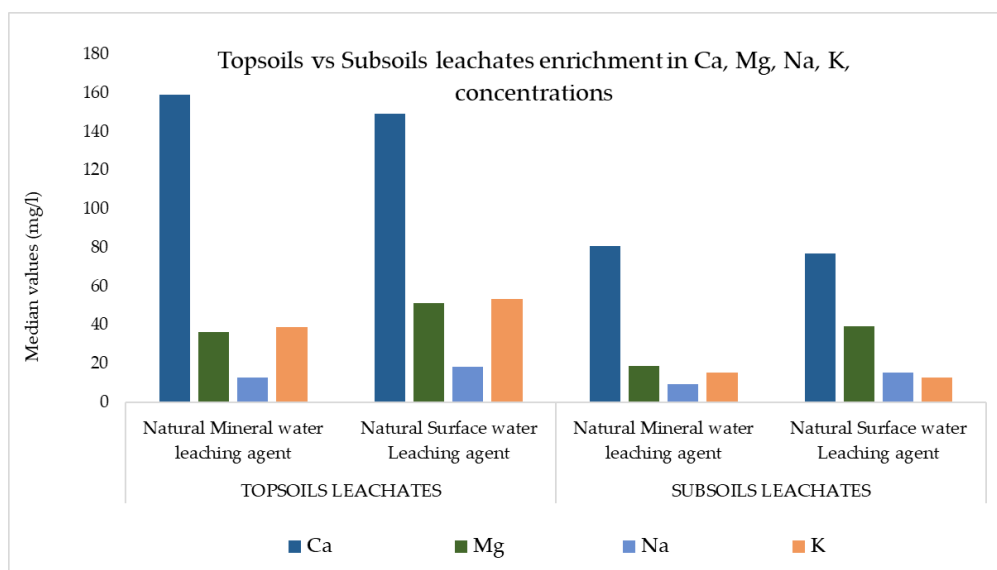

**Figure S1.** Comparison of Ca, Mg, Na and K concentrations in topsoils and in subsoils leachates.
